# Supplementary material for: Vulgarin, a Sesquiterpene Lactone from Artemisia judaica, Improves the Antidiabetic Effectiveness of Glibenclamide in Streptozotocin-Induced Diabetic Rats via Modulation of PEPCK and G6Pase Genes Expression
Source: MDPI journal article supplement (doi:10.3390/ijms232415856), 2022-12-13
Supplement: s1 [file s1]

# ***Vulgarin*, a sesquiterpene lactone from *Artemisia judaica* improves the antidiabetic effectiveness of glibenclamide in streptozotocin-induced diabetic rats via modulation of PEPCK and G6Pase genes expression**

**Hassan N. Althurwi <sup>a</sup>, Gamal A. Soliman <sup>a,b</sup>, Rehab F. Abdel-Rahman <sup>c</sup>, Reham M. Abd-Elsalam<sup>d</sup>, Hanan A. Ogaly <sup>e,f</sup>, Mohammed H. Alqarni <sup>g</sup>, Maged S. Abdel-Kader <sup>g,h,\*</sup>**

<sup>a</sup> Department of Pharmacology, College of Pharmacy, Prince Sattam Bin Abdulaziz University, Al-Kharj 11942, Saudi Arabia

<sup>b</sup> Department of Pharmacology, College of Veterinary Medicine, Cairo University, Egypt

<sup>c</sup> Department of Pharmacology, National Research Centre, Egypt

<sup>d</sup> Department of Pathology, College of Veterinary Medicine, Cairo University, Egypt

<sup>e</sup> Department of Chemistry, College of Science, King Khalid University, Abha, Saudi Arabia

<sup>f</sup> Department of Biochemistry, College of Veterinary Medicine, Cairo University, Egypt

<sup>g</sup> Department of Pharmacognosy, College of Pharmacy, Prince Sattam Bin Abdulaziz University, Al-Kharj 11942, Saudi Arabia

<sup>h</sup> Department of Pharmacognosy, College of Pharmacy, Alexandria University, Alexandria 21215, Egypt

**Vulgarin (VGN):** Colourless crystals, m.p. 175 °C;  $[\alpha]^{25}_D = +43$ ; UV  $\lambda_{\text{max}}$  216 nm;  $^1\text{H}$  and  $^{13}\text{C}$  NMR Table S1; HRESIMS  $[\text{M}+1]^+ m/z$  265.1429 (calcd for  $\text{C}_{15}\text{H}_{20}\text{O}_4+\text{H}$ , 265.1440, 6%),  $[\text{M}+\text{Na}]^+ m/z$  287.1247 (calcd for  $\text{C}_{15}\text{H}_{20}\text{O}_4+\text{Na}$ , 287.1259, 100%),  $[\text{M}-1]^+ m/z$  263.1287 (calcd for  $\text{C}_{15}\text{H}_{20}\text{O}_4-\text{H}$ , 263.1283, 100%).

**4-Epivulgarin (VGN):** Colourless crystals, m.p. 193 °C;  $[\alpha]^{25}_D = +82$ ; UV  $\lambda_{\text{max}}$  215 nm;  $^1\text{H}$  and  $^{13}\text{C}$  NMR Table S1; HRESIMS  $[\text{M}+1]^+ m/z$  265.1429 (calcd for  $\text{C}_{15}\text{H}_{20}\text{O}_4+\text{H}$ , 265.1440, 55%),  $[\text{M}+\text{Na}]^+ m/z$  287.1248 (calcd for  $\text{C}_{15}\text{H}_{20}\text{O}_4+\text{Na}$ , 287.1259, 100%),  $[\text{M}-1]^+ m/z$  263.1288 (calcd for  $\text{C}_{15}\text{H}_{20}\text{O}_4-\text{H}$ , 263.1288, 100%).

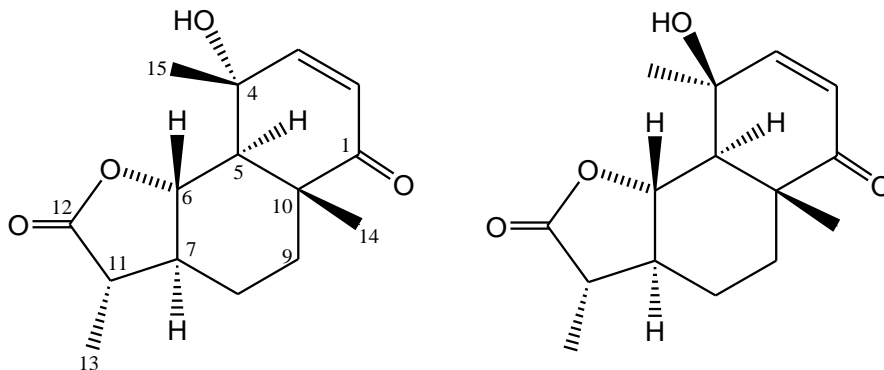

**Table S1.**  $^1\text{H}$  and  $^{13}\text{C}$  NMR data for VGN and eVGN ( $\text{CDCl}_3$ ,  $\delta$  in ppm).

|           | Vulgarin (VGN)         |                 | 4-Epivulgarin (eVGN)   |                 |
|-----------|------------------------|-----------------|------------------------|-----------------|
|           | $^1\text{H}$           | $^{13}\text{C}$ | $^1\text{H}$           | $^{13}\text{C}$ |
| <b>1</b>  | -                      | 201.80          | -                      | 203.64          |
| <b>2</b>  | 5.72 (d, $J=10.3$ Hz)  | 125.31          | 5.72 (d, $J=10.3$ Hz)  | 124.64          |
| <b>3</b>  | 6.47 (d, $J=10.3$ Hz)  | 152.03          | 6.42 (d, $J=10.3$ Hz)  | 151.22          |
| <b>4</b>  | -                      | 69.91           | -                      | 67.76           |
| <b>5</b>  | 2.27 (d, $J=10.95$ Hz) | 54.39           | 1.88 (d, $J=10.95$ Hz) | 50.97           |
| <b>6</b>  | 4.06 (t, $J=11$ Hz)    | 79.41           | 4.25 (t, $J=10.75$ Hz) | 79.34           |
| <b>7</b>  | 1.54 (m)               | 52.19           | 1.55 (m)               | 52.20           |
| <b>8</b>  | 1.37 (m), 1.85 (m)     | 22.53           | 1.39 (m), 1.81 (m)     | 22.61           |
| <b>9</b>  | 1.37 (m), 1.85 (m)     | 34.01           | 1.39 (m), 1.81 (m)     | 32.52           |
| <b>10</b> | -                      | 46.25           | -                      | 45.97           |
| <b>11</b> | 2.22 (m)               | 40.39           | 2.21 (h, $J=6.85$ Hz)  | 40.71           |
| <b>12</b> | -                      | 178.43          | -                      | 179.46          |
| <b>13</b> | 1.09 (d, $J=6.95$ Hz)  | 12.39           | 1.09 (d, $J=6.95$ Hz)  | 12.39           |
| <b>14</b> | 1.07 (s)               | 19.71           | 1.20 (s)               | 20.65           |
| <b>15</b> | 1.41 (s)               | 23.56           | 1.44 (s)               | 31.09           |
| <b>OH</b> | 2.95 (s)               | -               | 3.03 (s)               | -               |

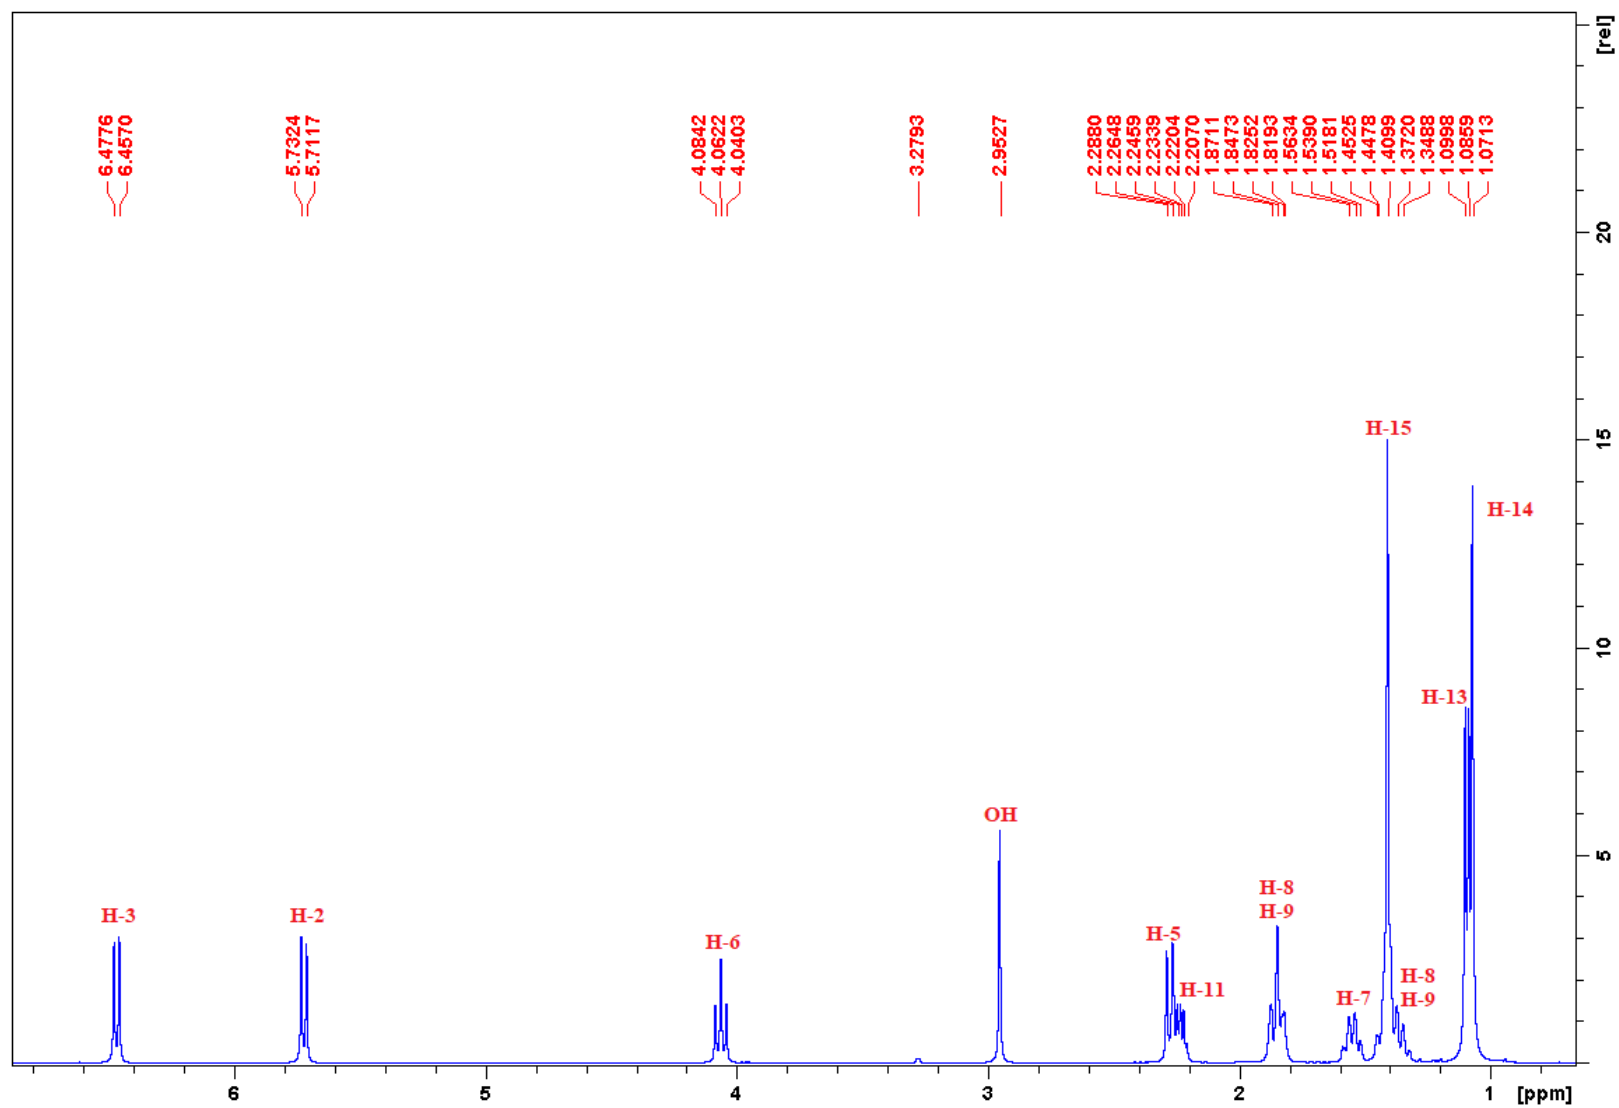

Figure S1: <sup>1</sup>H NMR data for VGN.

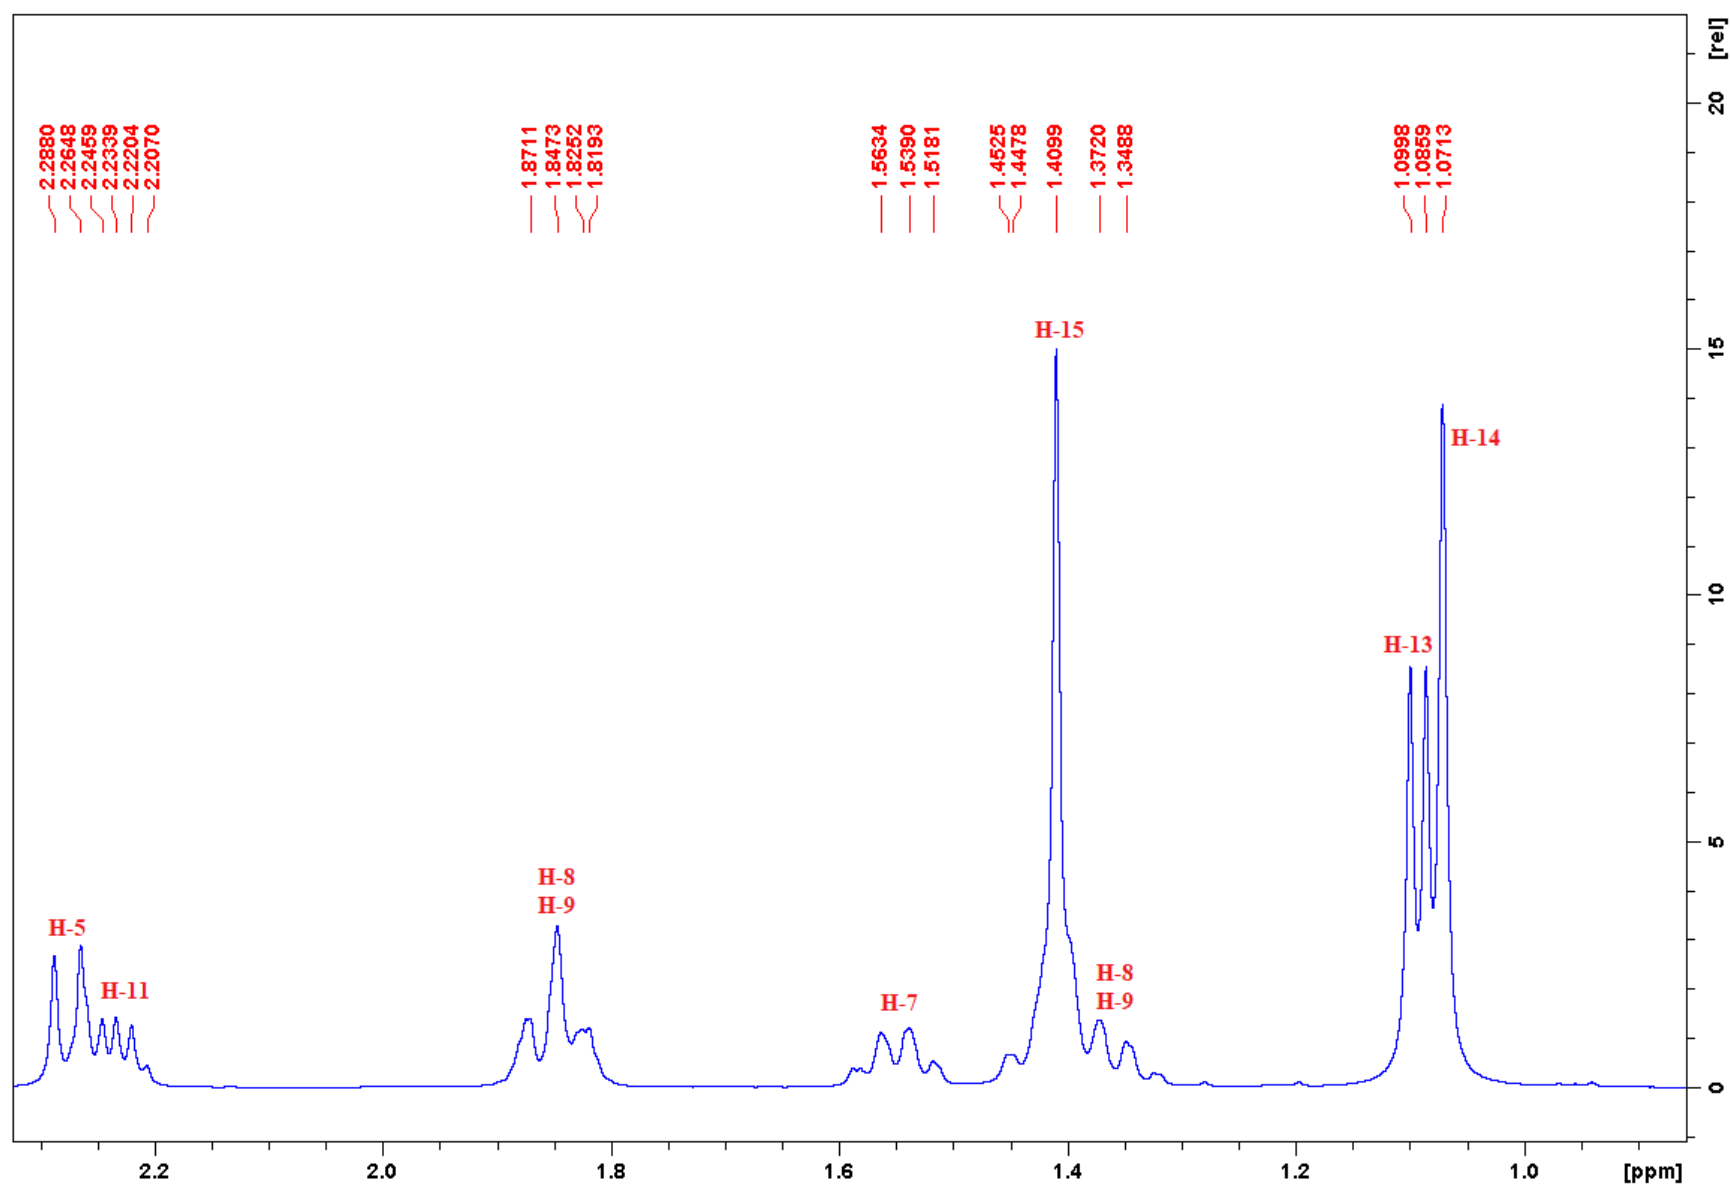

Figure S2: <sup>1</sup>H NMR data for VGN (Exp.).

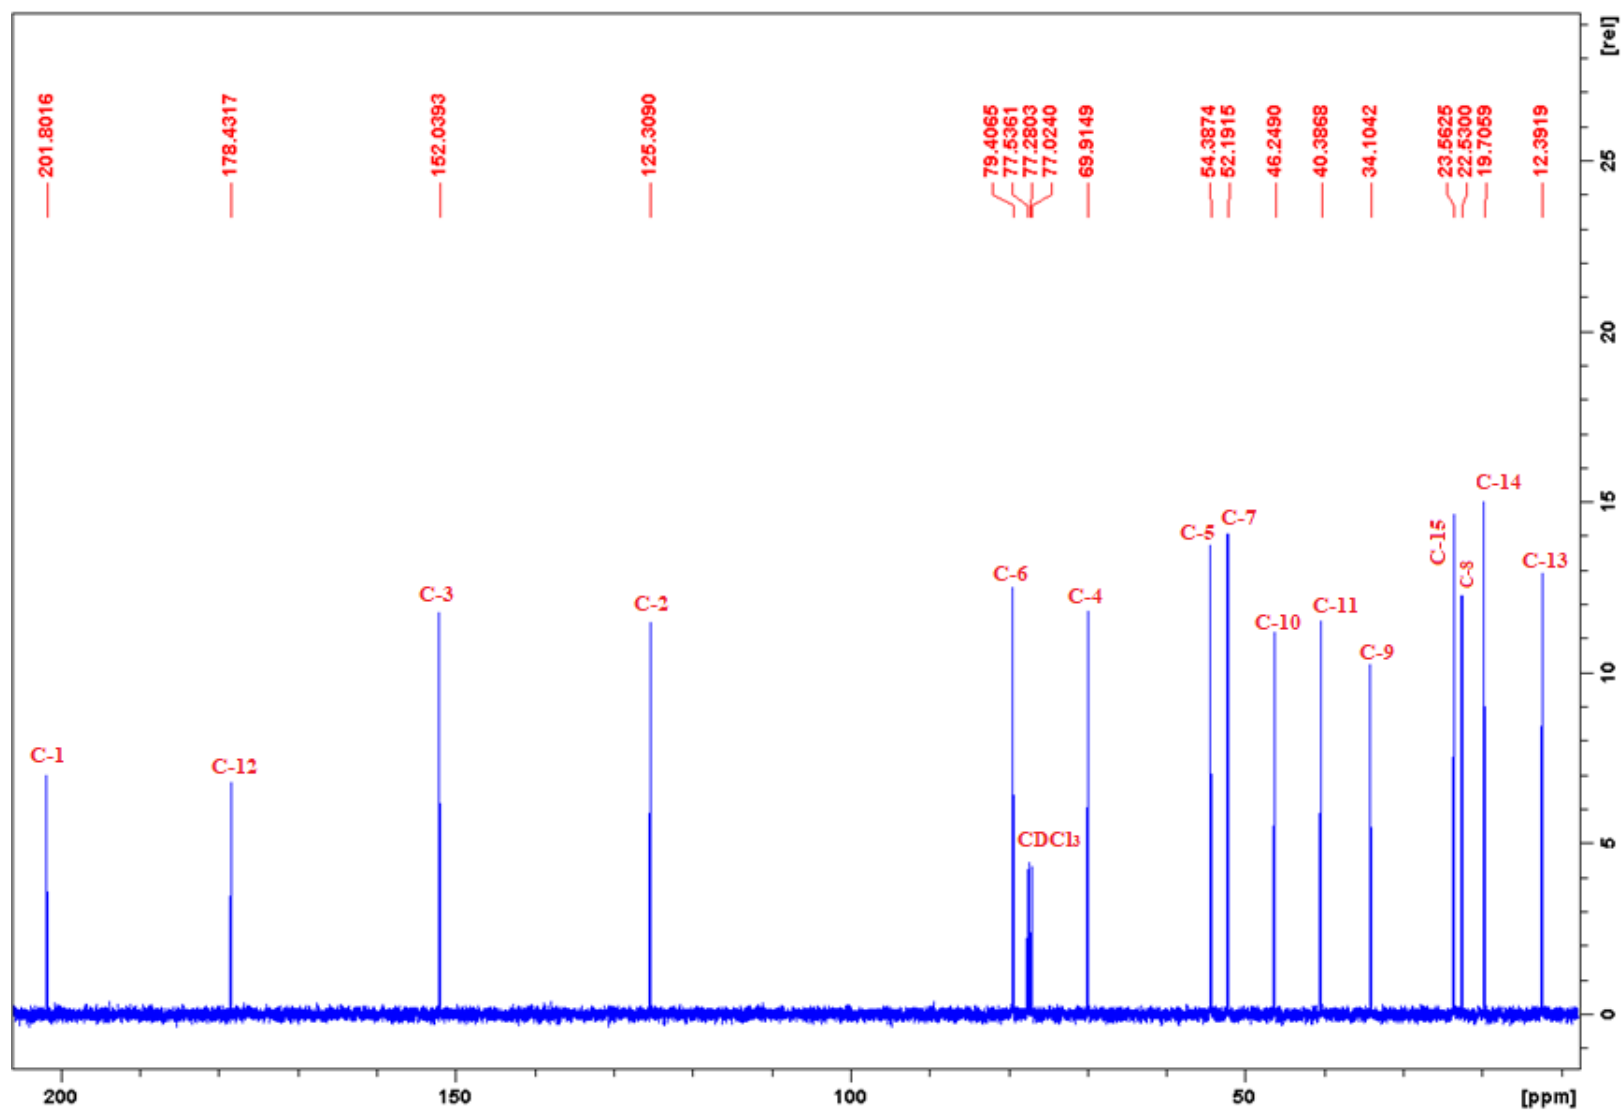

Figure S3: <sup>13</sup>C NMR data for VGN.

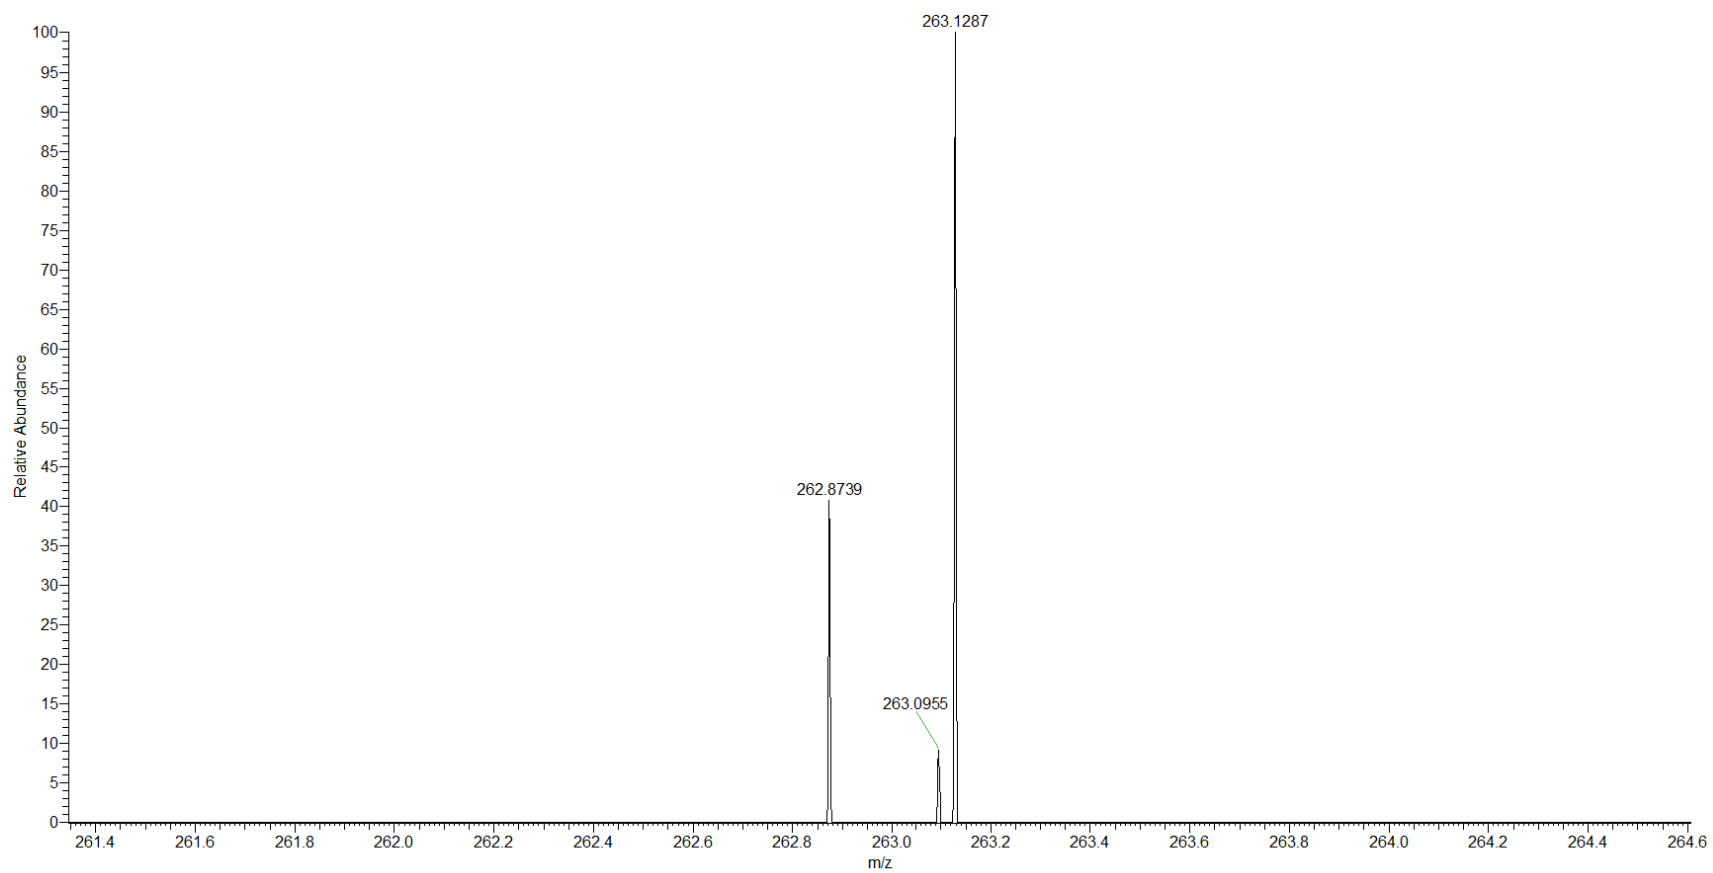

**Figure S4: HRESIMS data of VGN (negative mode).**

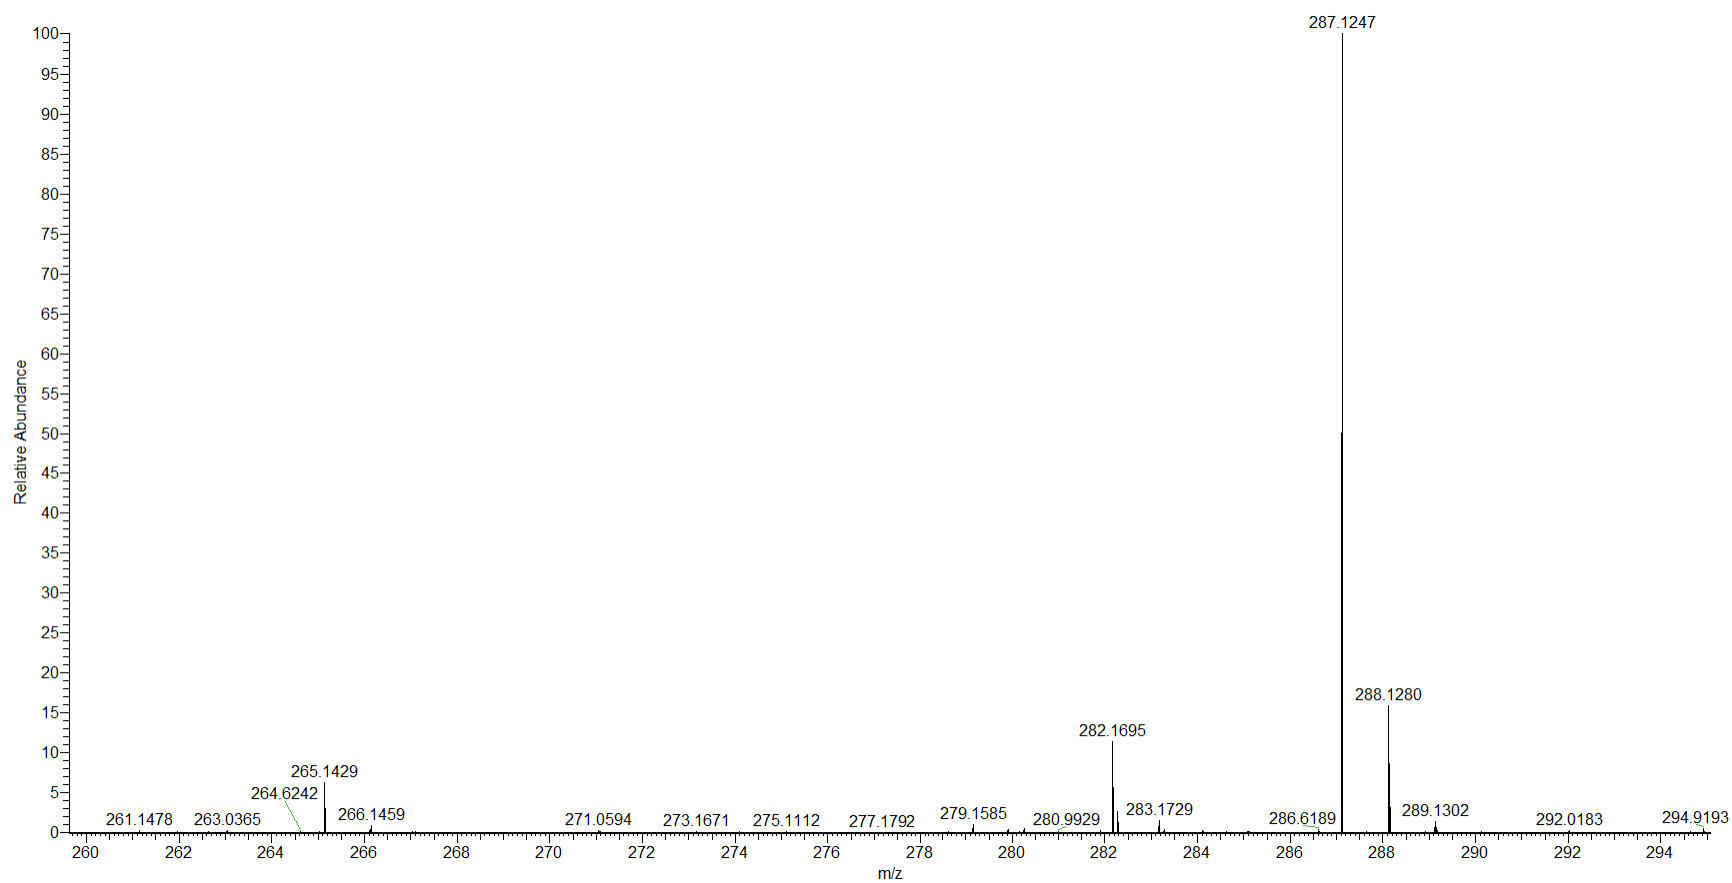

**Figure S5: HRESIMS data of VGN (positive mode).**

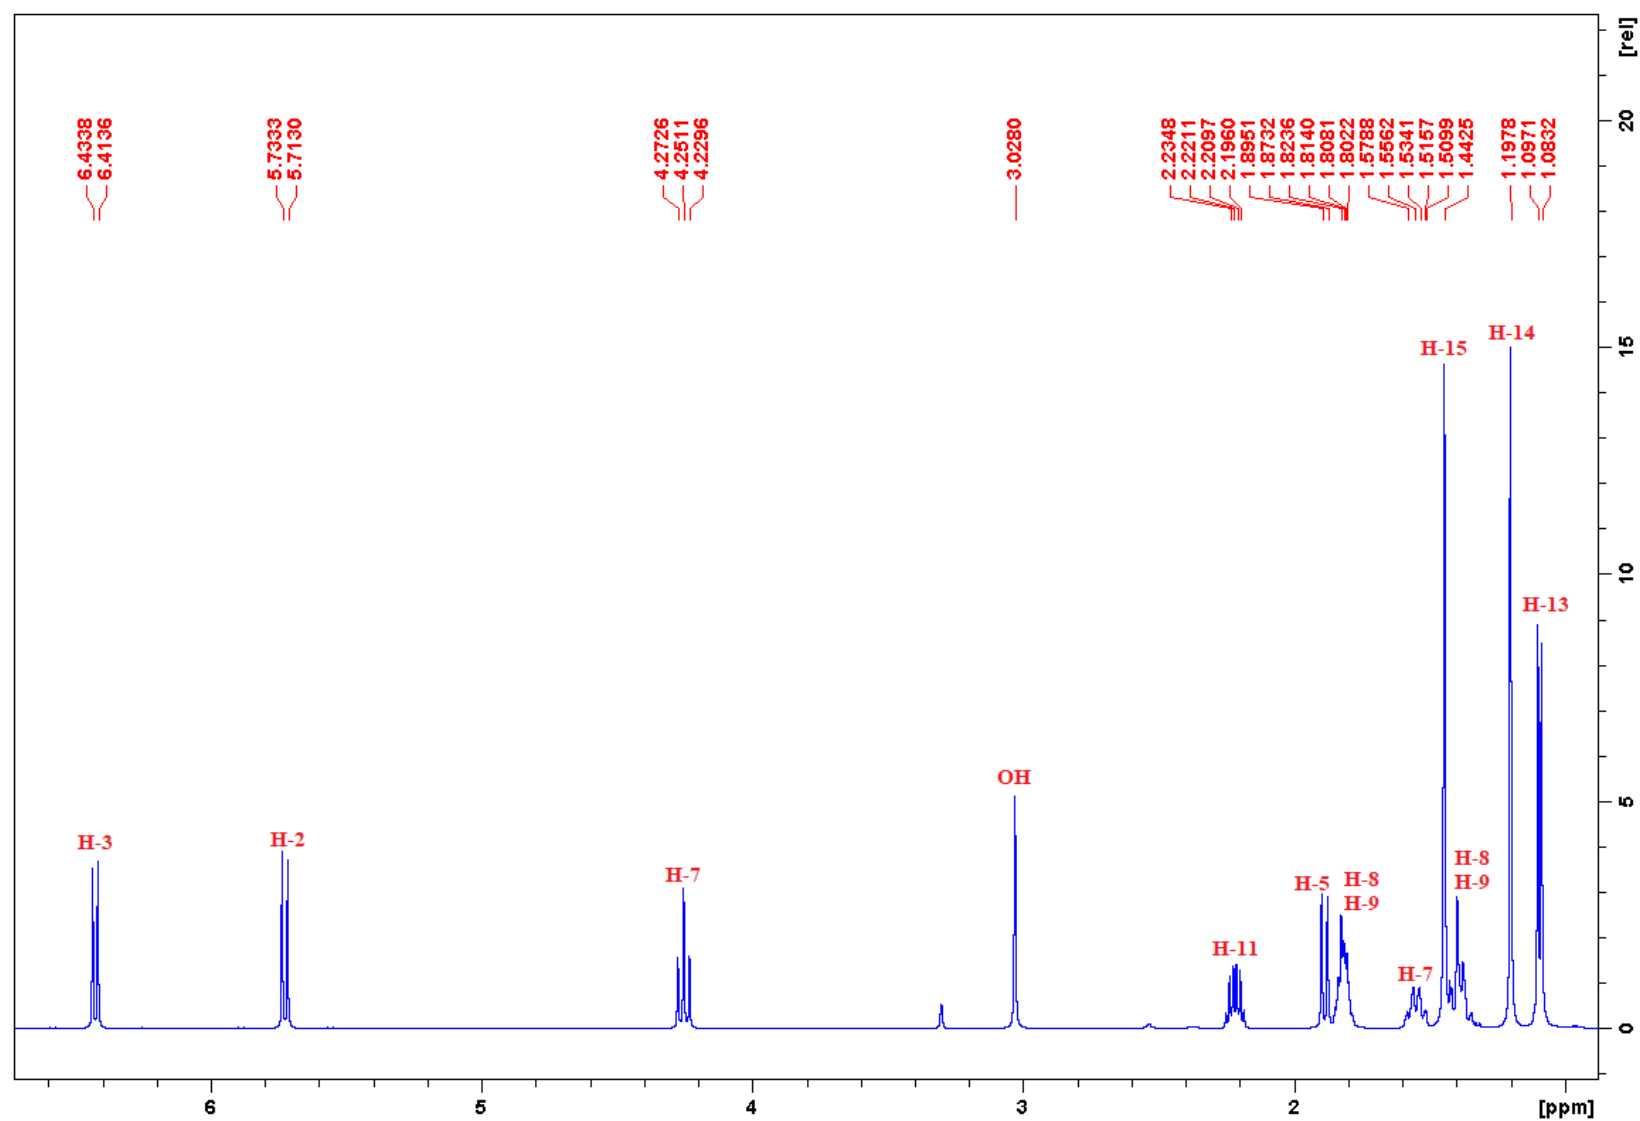

Figure S6: <sup>1</sup>H NMR data for eVGN.



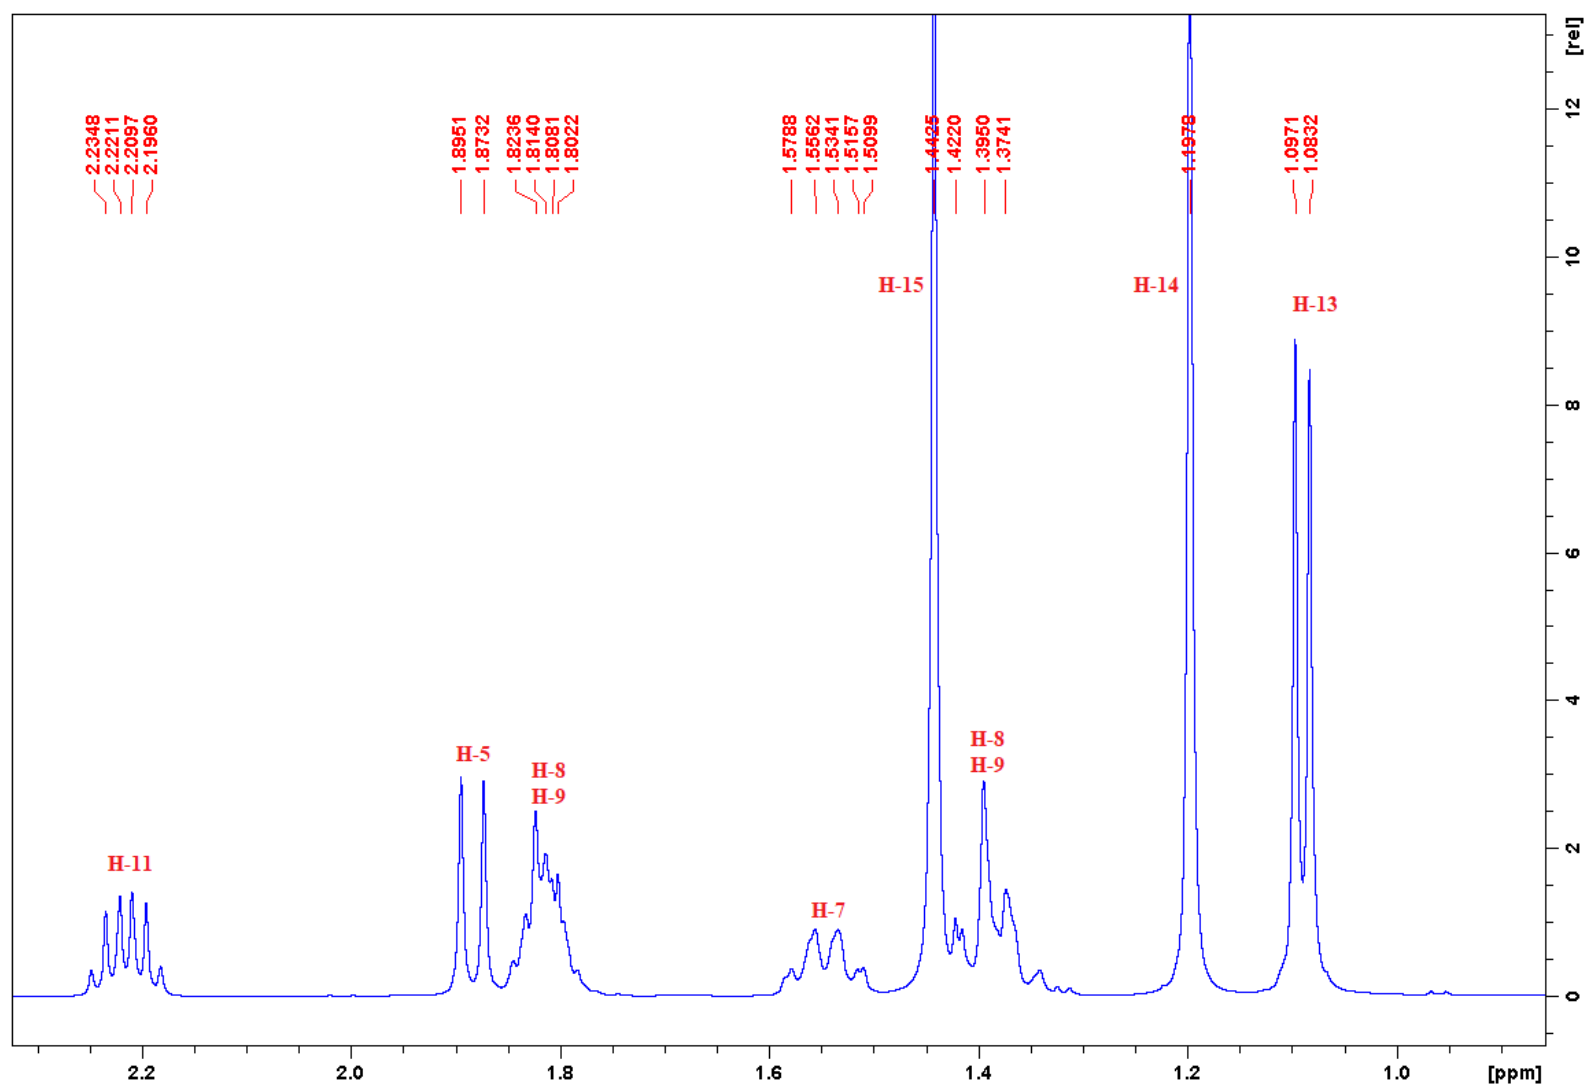

Figure S7: <sup>1</sup>H NMR data for eVGN (Exp.).

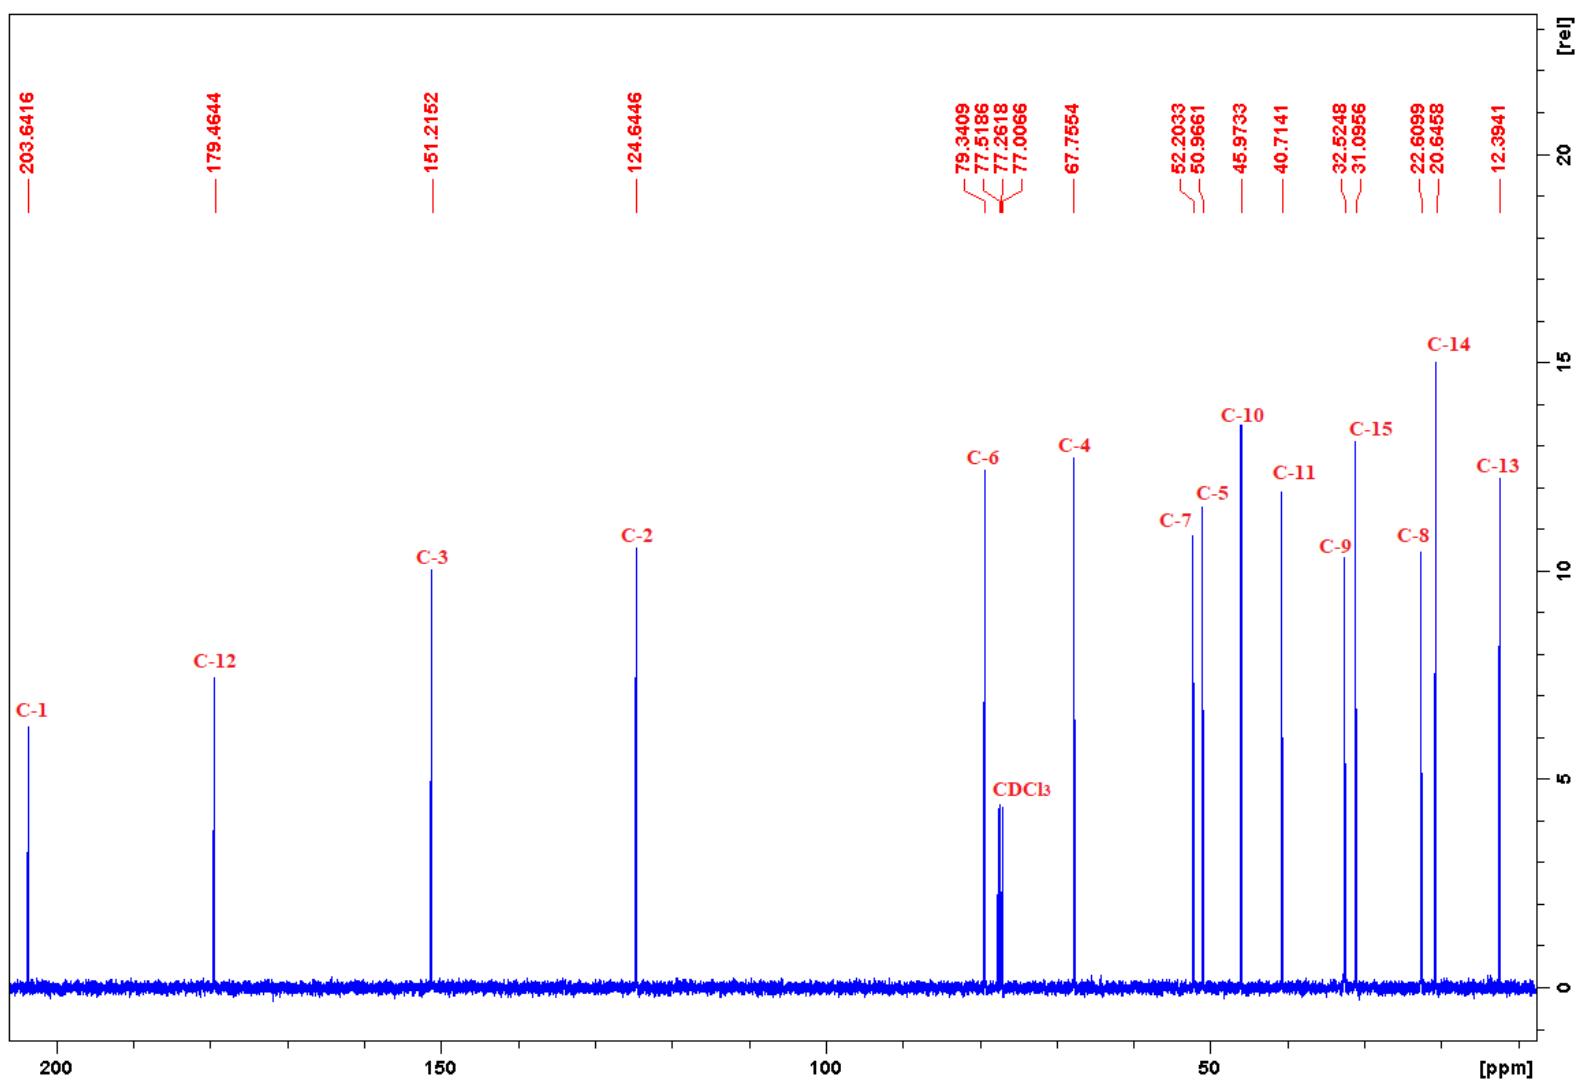

Figure S8: <sup>13</sup>C NMR data for eVGN.

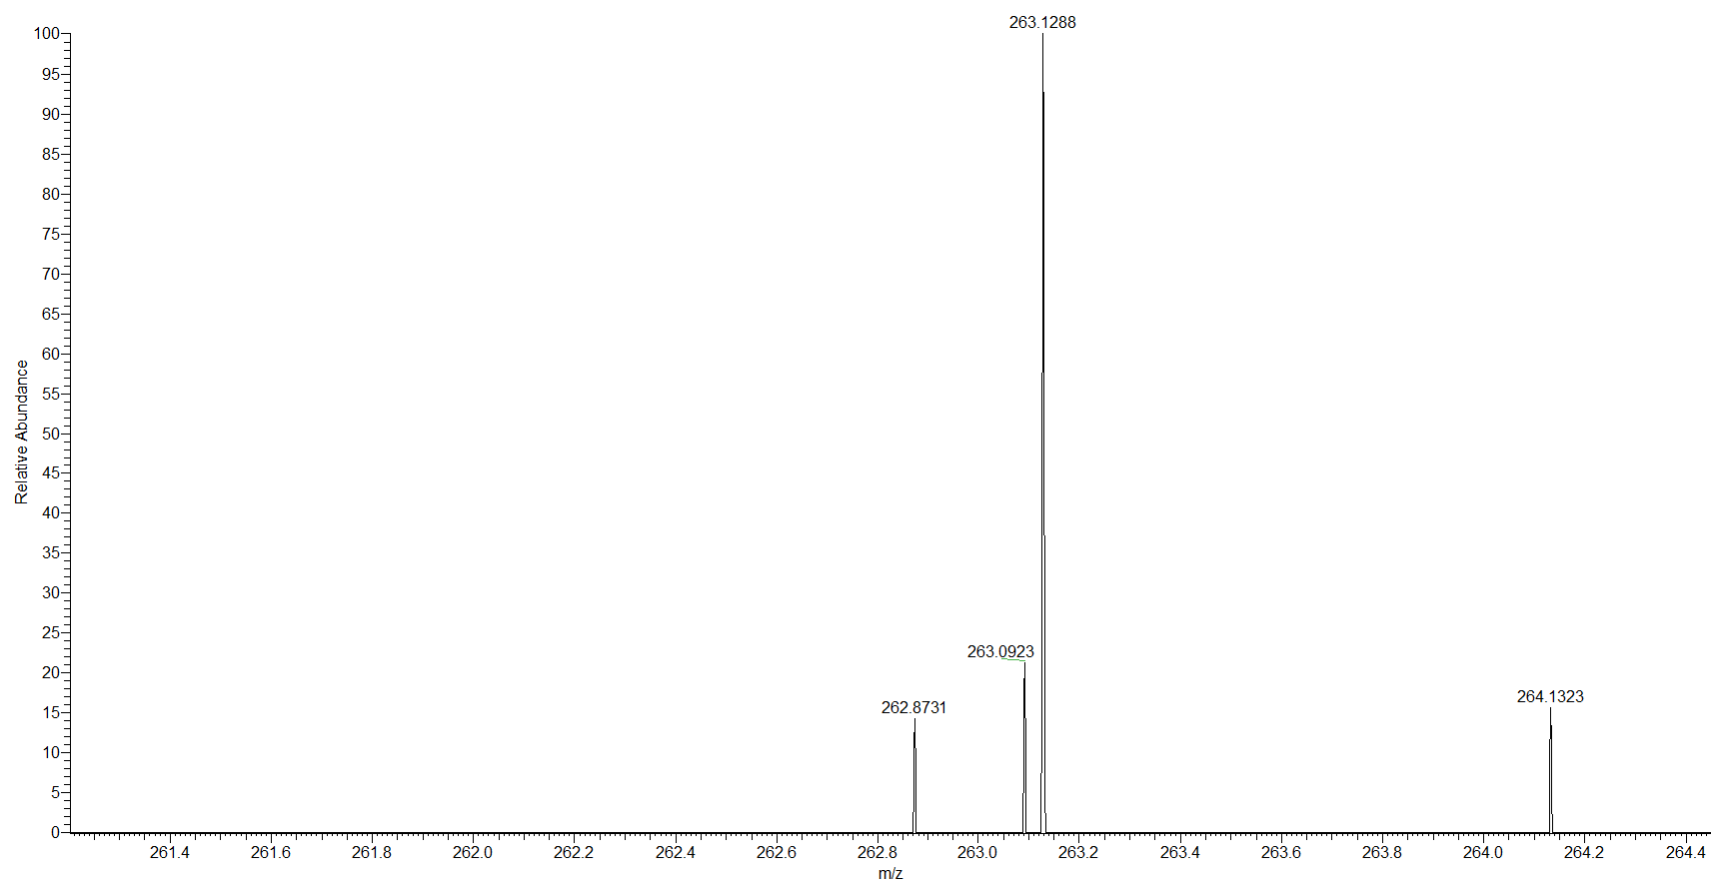

**Figure S9: HRESIMS data of eVGN (negative mode).**

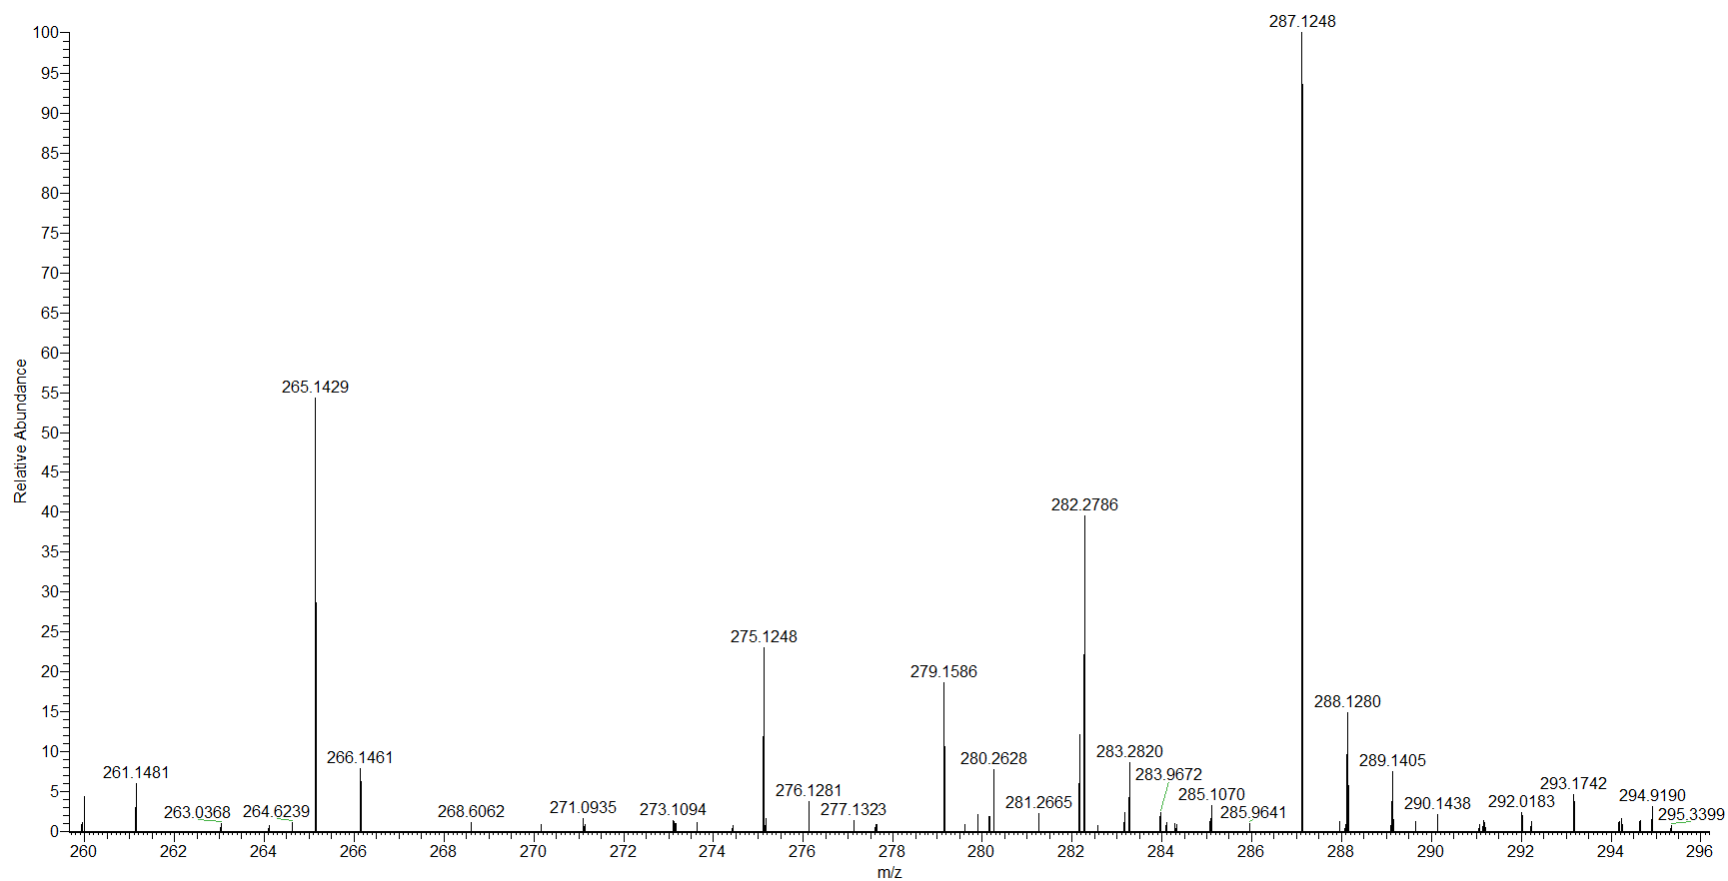

**Figure S10: HRESIMS data of eVGN (positive mode).**
